# Supplementary material
Source: MDPI journal article supplement (https://www.mdpi.com/2073-4395/12/7/1649)
Supplement: s1 [file s1]

**Table S1.** Meteorological data of Jiande County, Hangzhou, China during 2019–2021.

| Parameters    | Year | Month  |        |        |        |        |        |        |        |        |        |        |        |
|---------------|------|--------|--------|--------|--------|--------|--------|--------|--------|--------|--------|--------|--------|
|               |      | Jan.   | Feb.   | Mar.   | Apr.   | May    | June   | July   | Aug.   | Sep.   | Oct.   | Nov.   | Dec.   |
| Aver. Temp.   | 2019 | 5.85   | 6.13   | 12.41  | 18.13  | 22.11  | 24.96  | 28.20  | 29.37  | 25.09  | 20.06  | 14.52  | 8.70   |
|               | 2020 | 7.26   | 9.86   | 13.15  | 16.44  | 23.51  | 26.09  | 26.86  | 31.05  | 23.90  | 19.17  | 15.01  | 13.00  |
|               | 2021 | 6.52   | 10.91  | 12.67  | 17.62  | 23.39  | 25.97  | 29.29  | 28.59  | 29.54  | 20.39  | 13.80  | 8.54   |
| Max. Temp.    | 2019 | 9.08   | 8.60   | 17.1   | 23.34  | 27.24  | 29.33  | 32.39  | 34.19  | 29.28  | 24.36  | 19.38  | 12.98  |
|               | 2020 | 10.06  | 14.37  | 17.55  | 22.06  | 28.64  | 30.15  | 30.85  | 36.01  | 27.79  | 23.03  | 18.83  | 11.12  |
|               | 2021 | 11.74  | 15.63  | 17.23  | 21.85  | 28.64  | 30.47  | 33.43  | 32.95  | 27.69  | 24.55  | 18.35  | 13.51  |
| Min. Temp.    | 2019 | 3.51   | 4.28   | 9.05   | 14.27  | 17.65  | 21.66  | 24.97  | 25.60  | 21.46  | 16.73  | 10.83  | 5.23   |
|               | 2020 | 5.22   | 6.36   | 9.83   | 11.56  | 19.64  | 23.30  | 24.14  | 27.07  | 20.77  | 15.88  | 12.05  | 3.11   |
|               | 2021 | 2.66   | 7.88   | 9.75   | 14.17  | 19.48  | 22.66  | 26.27  | 25.31  | 14.18  | 17.16  | 10.16  | 4.74   |
| Rel. Hum. (%) | 2019 | 78.35  | 85.89  | 73.74  | 75.20  | 62.84  | 78.00  | 78.32  | 73.19  | 71.43  | 71.87  | 69.20  | 67.05  |
|               | 2020 | 81.00  | 73.55  | 72.32  | 60.07  | 71.68  | 84.79  | 84.68  | 64.52  | 74.60  | 69.71  | 72.20  | 71.21  |
|               | 2021 | 58.97  | 7.29   | 76.00  | 68.23  | 47.97  | 78.47  | 74.97  | 77.03  | 60.97  | 52.06  | 44.87  | 37.90  |
| Rainfall (mm) | 2019 | 141.86 | 272.53 | 167.10 | 122.84 | 201.16 | 244.80 | 306.90 | 715.89 | 316.20 | 85.87  | 71.18  | 87.90  |
|               | 2020 | 227.60 | 82.40  | 155.10 | 45.70  | 152.30 | 386.68 | 293.14 | 157.62 | 317.57 | 112.45 | 38.88  | 51.03  |
|               | 2021 | 71.74  | 174.87 | 298.58 | 127.29 | 319.30 | 393.00 | 830.97 | 703.31 | 765.32 | 243.87 | 145.09 | 40.74  |
| Sunshine(h)   | 2019 | 71.40  | 24.30  | 127.10 | 125.00 | 174.70 | 118.50 | 152.50 | 228.50 | 189.70 | 151.10 | 149.20 | 125.70 |
|               | 2020 | 73.90  | 108.50 | 109.20 | 197.50 | 124.30 | 60.80  | 102.70 | 258.00 | 122.90 | 134.00 | 131.90 | 105.50 |
|               | 2021 | 171.90 | 111.50 | 106.40 | 131.40 | 146.50 | 127.00 | 179.10 | 177.84 | 187.00 | 148.30 | 144.70 | 191.40 |

Temp: Temperature; Aver: Average; Max: Maximum; Min: Minimum; Hum: humidity. Rel: Relative.

**Table S2.** Effect of different organic and chemical fertilizers on sweet potato fresh weight.

| Treatments<br>(kg/m <sup>2</sup> ) | above-ground FW (kg) |                |              | below ground FW (kg) |               |               | Total FW (kg)  |                |              |
|------------------------------------|----------------------|----------------|--------------|----------------------|---------------|---------------|----------------|----------------|--------------|
|                                    | 2019                 | 2020           | 2021         | 2019                 | 2020          | 2021          | 2019           | 2020           | 2021         |
| COF (0.45)                         | 33.72±0.64abc        | 36.66±1.26abc  | 38.40±0.52c  | 36.48±2.68c          | 44.38±0.75abc | 50.42±0.25c   | 70.20±1.23e    | 81.05±1.04ab   | 88.82±0.44b  |
| COF (0.90)                         | 33.82±0.26abc        | 34.32±0.43e    | 36.28±0.51de | 37.48±1.08bc         | 43.87±0.88bcd | 55.25±0.53a   | 71.30±1.15cde  | 79.85±1.57abc  | 91.53±2.01a  |
| COF (1.35)                         | 34.15±0.54abc        | 35.55±0.09cd   | 36.67±0.65de | 37.60±0.59 bc        | 45.88±0.48a   | 52.30±0.61b   | 71.75±0.10bcde | 81.43 ± 0.79 a | 88.97±1.17b  |
| COF (1.80)                         | 34.30±0.84ab         | 37.45±0.53a    | 37.15±0.98d  | 38.87±0.51ab         | 42.62±0.42de  | 46.60±1.78de  | 73.17±0.84ab   | 80.07±0.70abc  | 83.75±0.95de |
| SM (0.45)                          | 33.83±0.90abc        | 35.89±0.47bcd  | 41.80±0.54a  | 34.52±0.23 d         | 39.93±0.75 f  | 46.60±0.23 de | 68.35±0.35f    | 75.82±0.74e    | 85.07±0.39cd |
| SM (0.75)                          | 32.83±0.35c          | 36.35±0.15 abc | 38.55±0.48c  | 37.95±0.78abc        | 43.92±0.35bcd | 49.77±1.98c   | 70.78±0.28cde  | 80.27±1.29abc  | 87.98±1.08b  |
| SM (1.05)                          | 34.18±0.63abc        | 36.95±0.61 ab  | 39.97±0.83b  | 38.30±0.48abc        | 43.53±1.53cd  | 46.91±0.54d   | 72.48±0.16abc  | 80.48±0.36abc  | 86.88±2.39bc |
| SM (1.35)                          | 33.52±0.84abc        | 37.25±0.67a    | 39.10±0.92bc | 37.00±1.55bc         | 43.23±1.03cd  | 46.42±0.13de  | 70.52±0.43de   | 80.48±1.58abc  | 85.52±0.98cd |
| MR (1.50)                          | 34.85±1.01a          | 35.69±0.38bcd  | 36.83±0.71de | 37.13±1.25 bc        | 40.47±0.54 f  | 45.15±0.51 e  | 71.98±1.90bcd  | 76.16±0.49 de  | 81.98±0.28e  |
| MR (2.25)                          | 33.57±0.45abc        | 36.87±0.43ab   | 35.97±0.44de | 36.52±0.64 c         | 41.37±1.02 ef | 46.08±0.83de  | 70.08±0.43e    | 78.23±1.24cd   | 82.05±0.90e  |
| MR (3.00)                          | 33.18±0.75bc         | 36.72±1.18abc  | 35.81±0.57de | 37.40±0.18bc         | 41.45±1.83ef  | 46.56±0.49de  | 70.58±1.32de   | 78.17±1.16cde  | 82.37±0.09e  |
| MR (3.75)                          | 34.28±0.16ab         | 35.97±0.71bcd  | 36.75±0.65de | 37.12±0.90bc         | 42.72±0.48cde | 47.28±0.32d   | 71.40±1.13cde  | 78.68±2.59bc   | 84.03±1.41de |
| CCF (0.075)                        | 34.10±0.92abc        | 34.91±0.60de   | 35.43±1.94e  | 39.88±0.43a          | 45.47±0.52ab  | 49.27±0.79c   | 73.98±0.55a    | 80.38±1.91abc  | 84.70±2.30cd |
| Control                            | 31.37±0.95d          | 27.45±0.66f    | 29.75±0.74f  | 29.92±1.38e          | 37.98±0.07g   | 40.23±0.39f   | 61.28±0.40g    | 65.43±1.03f    | 69.98±1.13f  |

COF: commercial organic fertilizer; SM: sheep manure; MR: mushroom residue; CCF: chemical compound fertilizer; FW: fresh weight. Values with different lowercase letters within the same column indicate significant differences ( $p < 0.05$ ).

**Table S3.** Effect of different organic and chemical fertilizers on the soil pH and organic matter content.

| Treatments<br>(kg/m <sup>2</sup> ) | pH          |            |            | OMC (g/kg)      |              |              |
|------------------------------------|-------------|------------|------------|-----------------|--------------|--------------|
|                                    | 2019        | 2020       | 2021       | 2019            | 2020         | 2021         |
| COF (0.45)                         | 4.74±0.11a  | 4.75±0.13a | 4.79±0.08a | 14.95±0.55cd    | 16.55±0.46f  | 21.97±0.33e  |
| COF (0.90)                         | 4.69±0.11a  | 4.75±0.10a | 4.81±0.12a | 14.96±0.55cd    | 16.26±0.28f  | 25.07±0.85ab |
| COF (1.35)                         | 4.71±0.09 a | 4.74±0.17a | 4.80±0.09a | 15.90±0.56abc   | 18.51±0.30de | 25.07±0.91ab |
| COF (1.80)                         | 4.67±0.16a  | 4.73±0.18a | 4.79±0.12a | 16.03±0.70ab    | 19.48±0.59cd | 26.00±0.89ab |
| SM (0.45)                          | 4.68±0.18a  | 4.77±0.16a | 4.77±0.07a | 14.80±0.17d     | 15.89±0.73f  | 21.83±0.42de |
| SM (0.75)                          | 4.68±0.06a  | 4.81±0.06a | 4.81±0.04a | 16.71±0.65a     | 20.35±0.62bc | 24.83±0.93b  |
| SM (1.05)                          | 4.67±0.13a  | 4.76±0.13a | 4.82±0.09a | 16.50±0.36a     | 22.41±0.62a  | 26.11±0.21ab |
| SM (1.35)                          | 4.70±0.07a  | 4.75±0.11a | 4.80±0.09a | 15.12±0.43bcd   | 20.12±0.72bc | 26.18±0.69a  |
| MR (1.50)                          | 4.60±0.06a  | 4.72±0.06a | 4.75±0.04a | 15.40±0.44bcd   | 19.64±0.12bc | 22.92±0.33cd |
| MR (2.25)                          | 4.71±0.08a  | 4.74±0.20a | 4.78±0.15a | 13.18±0.41e     | 18.52±0.39de | 23.30±0.56c  |
| MR (3.00)                          | 4.66±0.15a  | 4.74±0.05a | 4.78±0.11a | 15.27±0.51bcd   | 18.38±0.91de | 25.13±0.42ab |
| MR (3.75)                          | 4.70±0.06a  | 4.72±0.26a | 4.81±0.10a | 15.12 ± 0.33bcd | 20.72±0.70b  | 25.87±0.80ab |
| CCF (0.075)                        | 4.67±0.06a  | 4.70±0.07a | 4.67±0.03a | 11.32±0.39g     | 10.68±0.60g  | 11.20±0.96f  |
| Control                            | 4.68±0.05a  | 4.77±0.09a | 4.77±0.06a | 12.23±0.66f     | 11.13±0.69g  | 11.00±0.80f  |

COF: commercial organic fertilizer; SM: sheep manure; MR: mushroom residue; CCF: chemical compound fertilizer; OMC: organic matter contents. Values with different lowercase letters within the same column indicate significant differences ( $p < 0.05$ ).

**Table S4.** Effect of different organic and chemical fertilizers on soil N, P and K nutrients.

| Treatments<br>(kg/m <sup>2</sup> ) | Total N (g/kg) |                |             | Available P (mg/kg) |              |                | Available K (mg/kg) |               |                |
|------------------------------------|----------------|----------------|-------------|---------------------|--------------|----------------|---------------------|---------------|----------------|
|                                    | 2019           | 2020           | 2021        | 2019                | 2020         | 2021           | 2019                | 2020          | 2021           |
| COF (0.45)                         | 0.94±0.15ab    | 0.93±0.17cde   | 1.01±0.12bc | 29.87±0.40a         | 26.06±0.84g  | 36.30±0.17cde  | 469.12±1.92b        | 466.89±3.25b  | 496.38±1.66b   |
| COF (0.90)                         | 1.07±0.15ab    | 1.11±0.14abcd  | 1.22±0.14a  | 27.33±0.95b         | 29.91±0.39e  | 37.10±0.46abcd | 467.21±2.37bc       | 461.49±0.57c  | 486.60±1.77de  |
| COF (1.35)                         | 0.95±0.11ab    | 0.98±0.14bcde  | 1.21±0.07a  | 26.23±0.32c         | 30.51±0.15de | 37.17±0.93abcd | 462.57±2.18c        | 479.95±1.26a  | 494.30±2.55bc  |
| COF (1.80)                         | 1.11±0.09a     | 1.16±0.20abc   | 1.24±0.10a  | 25.50±0.17cd        | 33.32±0.17ab | 37.60±0.20ab   | 434.22±1.39f        | 450.99±3.37e  | 479.34±1.79fg  |
| SM (0.45)                          | 1.02±0.16ab    | 1.05±0.11abcde | 1.19±0.06ab | 26.13±0.38c         | 33.89±0.47a  | 35.47±0.40ef   | 435.57±2.35f        | 447.34±0.63ef | 480.24±1.90fg  |
| SM (0.75)                          | 1.07±0.12ab    | 1.11± 0.01abcd | 1.24±0.02a  | 24.70±0.46d         | 29.83±0.60e  | 34.53±1.01fg   | 431.46±2.12fg       | 445.99±0.11f  | 479.09±2.16fg  |
| SM (1.05)                          | 1.10±0.09a     | 1.13±0.08abc   | 1.22±0.15a  | 25.20±0.57d         | 29.77±0.64e  | 37.37±0.76abc  | 456.11±3.32d        | 441.36±1.01g  | 482.75±5.34ef  |
| SM (1.35)                          | 1.02±0.18ab    | 1.14±0.14abc   | 1.23±0.08a  | 22.30±0.75ef        | 32.62±1.45bc | 36.10±0.82de   | 426.63±3.01g        | 470.52±1.56b  | 489.41±1.48cd  |
| MR (1.50)                          | 1.02±0.16ab    | 1.10± 0.13abcd | 1.19±0.09ab | 21.87±0.81f         | 27.70±0.17f  | 34.27±0.29g    | 445.98±2.99e        | 456.19±2.34d  | 471.30±4.79hi  |
| MR (2.25)                          | 1.11±0.07a     | 1.15±0.13abc   | 1.21±0.04a  | 23.10±0.79e         | 31.81±1.02c  | 36.83±0.50abcd | 420.26±0.26h        | 450.51±0.39e  | 467.00±3.16 ij |
| MR (3.00)                          | 1.11±0.09 a    | 1.22±0.12ab    | 1.27±0.15a  | 24.47±0.55d         | 32.58±0.33bc | 37.83±0.40a    | 427.29±5.67g        | 447.89±3.90ef | 471.43±0.42hi  |
| MR (3.75)                          | 1.08±0.08ab    | 1.28±0.12a     | 1.24±0.06a  | 25.13±0.49cd        | 31.61±0.33cd | 36.50±0.26bcde | 444.27±3.35e        | 457.36±2.06d  | 476.15±3.00gh  |
| CCF (0.075)                        | 1.02±0.14ab    | 0.86±0.16de    | 0.87±0.17cd | 27.90±0.40b         | 25.67±0.21g  | 36.57±0.97bcde | 481.34±1.83a        | 476.88±3.50a  | 520.66±4.11a   |
| Control                            | 0.86±0.02b     | 0.84±0.15d     | 0.74±0.15d  | 16.86±0.92g         | 11.74±0.74h  | 13.00±0.75h    | 433.00±2.95f        | 432.32±1.74h  | 435.50±2.85k   |

COF: commercial organic fertilizer; SM: sheep manure; MR: mushroom residue; CCF: chemical compound fertilizer. Values with different lowercase letters within the same column indicate significant differences ( $p < 0.05$ ).

**Table S5.** Effect of different organic fertilizers on the soil exchangeable Ca and Mg.

| Treatments<br>(kg/m <sup>2</sup> ) | exchangeable Ca (cmol (1/2 Ca <sup>2+</sup> )/kg) |               |             | exchangeable Mg (cmol (1/2 Mg <sup>2+</sup> )/kg) |               |               |
|------------------------------------|---------------------------------------------------|---------------|-------------|---------------------------------------------------|---------------|---------------|
|                                    | 2019                                              | 2020          | 2021        | 2019                                              | 2020          | 2021          |
| COF (0.45)                         | 5.06±0.12bcdef                                    | 4.98±0.14ef   | 3.56±0.50fg | 1.05±0.04bcd                                      | 1.04±0.12abcd | 1.02±0.04bcd  |
| COF (0.90)                         | 4.78±0.07f                                        | 5.41±0.13ef   | 3.92±0.58f  | 1.01±0.07cde                                      | 1.05±0.04abc  | 1.08±0.09abcd |
| COF (1.35)                         | 4.87±0.22def                                      | 5.38±0.04cd   | 6.32±0.59d  | 1.12±0.02ab                                       | 1.06±0.06abc  | 1.14±0.03a    |
| COF (1.80)                         | 5.00±0.25cdef                                     | 5.98±0.26abc  | 8.88±0.34b  | 1.20±0.06a                                        | 1.13±0.04ab   | 1.13±0.06ab   |
| SM (0.45)                          | 4.96±0.25def                                      | 5.94 ± 0.02a  | 5.36±0.32e  | 0.94±0.03e                                        | 0.92±0.13cd   | 1.13±0.02ab   |
| SM (0.75)                          | 5.26±0.07abcd                                     | 5.51±0.04bcd  | 4.05±0.30f  | 1.08±0.10bc                                       | 1.03±0.01abcd | 1.01±0.07cd   |
| SM (1.05)                          | 4.97±0.23def                                      | 5.61±0.22abcd | 5.12±0.75e  | 1.05±0.04bcd                                      | 1.14±0.02a    | 1.09±0.09abcd |
| SM (1.35)                          | 5.15±0.09bcde                                     | 5.69±0.31d    | 8.59±0.50b  | 0.96±0.02de                                       | 0.98±0.13bcd  | 1.12±0.06abc  |
| MR (1.50)                          | 5.57±0.17a                                        | 5.43±0.11e    | 4.99±0.25e  | 1.04±0.01bcd                                      | 1.23±0.11ab   | 1.10±0.06abcd |
| MR (2.25)                          | 4.97±0.29def                                      | 5.58±0.13abcd | 5.50±0.74de | 0.93±0.02e                                        | 1.04±0.10abcd | 1.07±0.03abcd |
| MR (3.00)                          | 5.34±0.08abc                                      | 5.89±0.17cd   | 9.97±0.42a  | 0.93±0.08e                                        | 0.90±0.05d    | 1.08±0.09abcd |
| MR (3.75)                          | 5.37±0.19ab                                       | 5.85±0.15ab   | 7.51±0.10c  | 1.02±0.02cde                                      | 1.12±0.04ab   | 1.09±0.06abcd |
| CCF (0.075)                        | 4.80±0.19ef                                       | 4.97±0.25f    | 3.38±0.69fg | 1.04±0.09bcd                                      | 1.05±0.10abc  | 1.06±0.03abcd |
| Control                            | 5.02±0.16bcdef                                    | 5.26±0.04ef   | 2.74±0.58g  | 1.05±0.02bcd                                      | 1.03±0.10abcd | 0.99±0.03d    |

COF: commercial organic fertilizer; SM: sheep manure; MR: mushroom residue; CCF: chemical compound fertilizer. Values with different lowercase letters within the same column indicate significant differences ( $p < 0.05$ ).
